# Supplementary material for: Effectiveness of surgical fixation for lateral compression type one (LC-1) fragility fractures of the pelvis: a systematic review
Source: PubMed Central journal article supplement — BMJ Open. 2019 May 19;9(5):e024737. doi: 10.1136/bmjopen-2018-024737 (PMC6530388; doi:10.1136/bmjopen-2018-024737), 2019-05-19
Supplement: bmjopen-2018-024737supp001.pdf [file bmjopen-2018-024737supp001.pdf]

## Supplementary file 1: Search Strategy for MEDLINE

Database: Epub Ahead of Print, In-Process & Other Non-Indexed Citations, Ovid MEDLINE(R) Daily and Ovid MEDLINE(R) <1946 to Present>

Search Strategy:

- 
- 1 exp Pelvic Bones/ (31120)
  - 2 (pelvis or pelvic).ti,ab. (129440)
  - 3 (ilium\$ or ilia or iliac).ti,ab. (39144)
  - 4 (ischium\$ or ischial or ischia or ischii).ti,ab. (2353)
  - 5 (pubis or (pubic adj2 (bone\$ or ramus or rami))).ti,ab. (3895)
  - 6 1 or 2 or 3 or 4 or 5 (183312)
  - 7 Fractures, Bone/ (69982)
  - 8 Osteoporotic Fractures/ (3912)
  - 9 Fractures, Compression/ (1736)
  - 10 7 or 8 or 9 (75036)
  - 11 6 and 10 (7124)
  - 12 (fractur\$ adj3 (pelvis or pelvic)).ti,ab. (4793)
  - 13 (fractur\$ adj3 (ilium\$ or ilia or iliac)).ti,ab. (280)
  - 14 (fractur\$ adj3 (ischium\$ or ischial or ischia or ischii)).ti,ab. (87)
  - 15 (fractur\$ adj3 pubis).ti,ab. (52)
  - 16 (fractur\$ adj3 pubic).ti,ab. (329)
  - 17 (fractur\$ adj3 lateral compression).ti,ab. (55)
  - 18 (fractur\$ adj3 (LC-1 or LC1)).ti,ab. (6)
  - 19 (fractur\$ adj3 sacral insufficiency).ti,ab. (205)
  - 20 or/12-19 (5458)
  - 21 (fractur\$ adj3 low-energy).ti,ab. (627)
  - 22 (fractur\$ adj3 (fragility or osteoporos\$ or osteopeni\$ or insufficiency)).ti,ab. (16528)
  - 23 21 or 22 (16963)
  - 24 23 and 6 (845)
  - 25 11 or 20 or 24 (9865)
  - 26 (pelvic adj2 ring adj2 injur\$).ti,ab. (446)
  - 27 (pelvic adj2 ring adj2 disrupt\$).ti,ab. (192)
  - 28 (lateral compression adj3 injur\$).ti,ab. (58)
  - 29 ((LC-1 or LC1) adj3 injur\$).ti,ab. (8)
  - 30 or/26-29 (625)
  - 31 25 or 30 (10009)
  - 32 exp Fracture Fixation/ (61190)
  - 33 exp Fracture Fixation, Internal/ (41947)
  - 34 exp Orthopedic Fixation Devices/ (76567)
  - 35 Infix.ti,ab. (23)
  - 36 (fractur\$ adj3 (fixation\$ or fixator\$ or stabilis\$ or stabiliz\$)).ti,ab. (11748)
  - 37 ((internal or external) adj3 (fixation\$ or fixator\$ or stabilis\$ or stabiliz\$)).ti,ab. (25648)
  - 38 ((anterior\$ or posterior\$) adj3 (fixation\$ or fixator\$ or stabilis\$ or stabiliz\$)).ti,ab. (6848)
  - 39 ((surgical or surgery or operati\$ or orthop?edic) adj3 (fixation\$ or fixator\$ or stabilis\$ or stabiliz\$)).ti,ab. (7737)
  - 40 ((pelvic or pelvis) adj3 (fixation\$ or fixator\$ or stabilis\$ or stabiliz\$)).ti,ab. (1210)
  - 41 ((plate\$ or plating\$ or screw\$ or nail\$ or pin or pins or rod or rods) adj6 (fixation\$ or fixator\$ or stabilis\$ or stabiliz\$)).ti,ab. (25375)
  - 42 (bone\$ adj6 (plate\$ or plating\$ or screw\$ or nail\$ or pin or pins or rod or rods)).ti,ab. (14857)
  - 43 ((pedicle or pedicular or polyaxial) adj2 screw\$).ti,ab. (5448)
  - 44 ((iliosacral or ilio-sacral or sacroiliac or sacro-iliac) adj2 screw\$).ti,ab. (422)

- 45 ((trans-sacral or transsacral) adj2 screw\$).ti,ab. (38)
- 46 pelvic bridg\$.ti,ab. (5)
- 47 ASIF.ti,ab. (675)
- 48 (posterior adj2 (plate\$ or plating)).ti,ab. (551)
- 49 (anterior adj2 (plate\$ or plating)).ti,ab. (1555)
- 50 (symphyseal adj2 (plate\$ or plating)).ti,ab. (40)
- 51 ((transiliac or trans-iliac or sacral or connect\$) adj2 rod\$).ti,ab. (431)
- 52 ((open or closed) adj2 reduction\$).ti,ab. (14389)
- 53 osteosynthesis.ti,ab. (10872)
- 54 (compression adj2 (plate\$ or plating)).ti,ab. (2027)
- 55 (compression adj2 fixation\$).ti,ab. (465)
- 56 ((fractur\$ or orthop?edic) adj2 (immobiliz\$ or immobilis\$)).ti,ab. (503)
- 57 or/32-56 (147341)
- 58 31 and 57 (3165)
- 59 exp animals/ not humans/ (4856249)
- 60 58 not 59 (3094)
- 61 limit 60 to yr="1980 -Current" (2769)
- 62 limit 61 to english language (2146)
