# Supplementary material for: Effectiveness of surgical fixation for lateral compression type one (LC-1) fragility fractures of the pelvis: a systematic review
Source: PubMed Central journal article supplement — BMJ Open. 2019 May 19;9(5):e024737. doi: 10.1136/bmjopen-2018-024737 (PMC6530388; doi:10.1136/bmjopen-2018-024737), 2019-05-19
Supplement: bmjopen-2018-024737supp002.pdf [file bmjopen-2018-024737supp002.pdf]

## Supplementary file 2: Studies excluded at second screening with reason for exclusion

| Reference                                                                                                                                                                                                                                                       | Reason for exclusion                 |
|-----------------------------------------------------------------------------------------------------------------------------------------------------------------------------------------------------------------------------------------------------------------|--------------------------------------|
| Lau TW, Leung F. Occult posterior pelvic ring fractures in elderly patients with osteoporotic pubic rami fractures. <i>Journal of Orthopaedic Surgery</i> . 2010;18(2):153-7.                                                                                   | Intervention (no LC1's had fixation) |
| Bohme J, Hoch A, Josten C. Osteoporotic fractures of the pelvis Osteoporotische Frakturen des Beckens. <i>Chirurg</i> . 2012;83(10):875-81.                                                                                                                     | Language                             |
| Caban A. External fixation in the treatment of pelvic fractures. <i>Ortopedia Traumatologia Rehabilitacja</i> . 1999;1(1):49-59.                                                                                                                                | Language                             |
| Chen LH, Shih CH, Hsu WW, Chen WJ, Wu CC, Su JY, et al. Anterior internal fixation of the disrupted sacroiliac joint: A preliminary report. <i>Journal of Surgical Association Republic of China</i> . 1993;26(3):1796-804.                                     | Language                             |
| Pavelka T, Salasek M, Weisova D. [Complications associated with surgical treatment of pelvic ring fractures]. <i>Acta Chirurgiae Orthopaedicae et Traumatologiae Cechoslovaca</i> . 2013;80(3):208-15.                                                          | Language                             |
| Zhang J, Wu K, Zhang W, Wu W, Hou S. [Percutaneous fixation of pelvic fracture by acutrak full thread headless hollow compression screw]. <i>Chinese journal of reparative and reconstructive surgery</i> . 2012;26(1):91-6.                                    | Language                             |
| [No authors listed]. Managing pelvic fractures. <i>Nursing</i> . 2003;33(12):43.                                                                                                                                                                                | Not research                         |
| [No authors listed]. SESAP critiques / critiques SESAP. <i>Canadian Journal of Surgery</i> . 1997;40(6):420.                                                                                                                                                    | Not research                         |
| Baird R. Open reduction of pelvic fractures. <i>Western Journal of Medicine</i> . 1991;155(2):171.                                                                                                                                                              | Not research                         |
| Bauer J, Holzl A, Verheyden A. The operative treatment of sacral insufficiency fracture with percutaneous iliosacral compression osteosynthesis with a pelvine internal fixator and cannulated iliosacral screws. <i>European Spine Journal</i> . 2013;22:2619. | Not research                         |
| Boobbyer GN. External fixation with the coat hanger method in treatment of unstable fractures of the pelvis. <i>Injury</i> . 1980;11(3):254-6.                                                                                                                  | Not research                         |
| Browner BD, Cole JD. Initial management of pelvic ring disruptions. <i>Instructional Course Lectures</i> . 1988;37:129-37.                                                                                                                                      | Not research                         |
| Leslie MP, Baumgaertner MR. Osteoporotic pelvic ring injuries. <i>Orthopedic Clinics of North America</i> . 2013;44(2):217-24.                                                                                                                                  | Not research                         |
| Rommens PM, Hofmann A. Comprehensive classification of fragility fractures of the pelvic ring: Recommendations for surgical treatment. <i>Injury</i> . 2013;44(12):1733-44.                                                                                     | Not research                         |
| Smith BL. How to manage that pelvic fracture. <i>Modern Medicine</i> . 2005;68(8):30-4; quiz 5.                                                                                                                                                                 | Not research                         |
| Smith JM. Pelvic fractures. <i>Western Journal of Medicine</i> . 1998;168(2):124-5.                                                                                                                                                                             | Not research                         |
| Stahel PF, Mauffrey C, Smith WR, McKean J, Hao J, Burlew CC, et al. External fixation for acute pelvic ring injuries: decision making and technical options. <i>The Journal of Trauma and Acute Care Surgery</i> . 2013;75(5):882-7.                            | Not research                         |
| Whyte Jt. Stress fractures of the pelvis and lower extremities. Diagnosis and management. <i>Advance for Nurse Practitioners</i> . 2005;13(7):55-6, 8-9.                                                                                                        | Not research                         |
| Wiss DA. What's new in orthopaedic trauma. <i>Journal of Bone &amp; Joint Surgery - American Volume</i> . 2002;84(11):2111-9.                                                                                                                                   | Not research                         |
| Youngman JR, Day AC. Pelvic fractures. <i>Hospital Medicine (London)</i> . 2002;63(12):750-2.                                                                                                                                                                   | Not research                         |
| Acker A, Perry ZH, Blum S, et al. Immediate percutaneous sacroiliac screw insertion for unstable pelvic fractures: is it safe enough? <i>European Journal of Trauma &amp; Emergency Surgery</i> 2018;44(2):163-69.                                              | Population                           |
| Barei DP, Shafer BL, Beingsner DM, Gardner MJ, Nork SE, Routt ML. The impact of open reduction internal fixation on acute pain management in unstable pelvic ring injuries. <i>Journal of Trauma-Injury Infection &amp; Critical Care</i> . 2010;68(4):949-53.  | Population                           |
| Bastian JD, Ansoorge A, Tomagra S, Benneker LM, Buchler L, Siebenrock KA, et al. Mid-term outcome following fixation of anterior pelvic ring injuries using the modified Stoppa approach. <i>Swiss Medical Weekly</i> . 2013;143:29S.                           | Population                           |
| Blasier DR, McAtee J, White R, Mitchell DT. Disruption of the pelvic ring in pediatric patients. <i>Clinical Orthopaedics and Related Research</i> . 2000;0(376):87-95.                                                                                         | Population                           |
| Chen PH, Hsu WH, Li YY, Huang TW, Huang TJ, Peng KT. Outcome analysis of unstable posterior ring injury of the pelvis: comparison between percutaneous iliosacral screw fixation and conservative treatment. <i>Biomedical Journal</i> . 2013;36(6):289-94.     | Population                           |

|                                                                                                                                                                                                                                                                                                |            |
|------------------------------------------------------------------------------------------------------------------------------------------------------------------------------------------------------------------------------------------------------------------------------------------------|------------|
| Dienstknecht T, Berner A, Lenich A, Nerlich M, Fuechtmeier B. A minimally invasive stabilizing system for dorsal pelvic ring injuries. <i>Clinical Orthopaedics &amp; Related Research</i> . 2011;469(11):3209-17.                                                                             | Population |
| Dolati B, Spiss R, Ennemoser O, Colleselli K. The fixation of pelvic ring fractures. <i>World Journal of Urology</i> . 1990;7(4):192-6.                                                                                                                                                        | Population |
| Dong J, Hao W, Wang B, Wang L, Li L, Mu W, et al. Management and outcome of pelvic fractures in elderly patients: a retrospective study of 40 cases. <i>Chinese Medical Journal</i> . 2014;127(15):2802-7.                                                                                     | Population |
| Eckardt H, Egger A, Hasler RM, et al. Good functional outcome in patients suffering fragility fractures of the pelvis treated with percutaneous screw stabilisation: Assessment of complications and factors influencing failure. <i>Injury</i> 2017;48(12):2717-23.                           | Population |
| Elzohairy MM, Salama AM. Open reduction internal fixation versus percutaneous iliosacral screw fixation for unstable posterior pelvic ring disruptions. <i>Orthopaedics &amp; traumatology, surgery &amp; research</i> 2017;103(2):223-27.                                                     | Population |
| Fang C, Alabdulrahman H and Pape HC. Complications after percutaneous internal fixator for anterior pelvic ring injuries. <i>Int Orthop</i> 2017; 24:24. DOI:10.1007/s00264-017-3415-4.                                                                                                        | Population |
| Gu R, Huang W, Yang L, et al. Comparisons of front plate, percutaneous sacroiliac screws, and sacroiliac anterior papilionaceous plate in fixation of unstable pelvic fractures. <i>Medicine</i> 2017;96(36):e7775.                                                                            | Population |
| Gvozdenovic R, Dahl B, Gehrchen M, Blyme P, Kioer T, Tondevold E. Fixation of unstable posterior pelvic ring fractures - a comparative study [Abstract]. <i>Acta orthopaedica Scandinavica</i> . 1998;69:17.                                                                                   | Population |
| Hagen J, Castillo R, Dubina A, Gaski G, Manson TT, O'Toole RV. Does Surgical Stabilization of Lateral Compression-type Pelvic Ring Fractures Decrease Patients' Pain, Reduce Narcotic Use, and Improve Mobilization? <i>Clinical Orthopaedics &amp; Related Research</i> . 2016;474(6):1422-9. | Population |
| Hoch A, Pieroh P, Henkelmann R, et al. In-screw polymethylmethacrylate-augmented sacroiliac screw for the treatment of fragility fractures of the pelvis: a prospective, observational study with 1-year follow-up. <i>BMC surgery</i> 2017;17(1):132.                                         | Population |
| Hoch A, Schneider I, Todd J, Josten C, Bohme J. Lateral compression type B 2-1 pelvic ring fractures in young patients do not require surgery. <i>European Journal of Trauma &amp; Emergency Surgery</i> . 2016;2:2.                                                                           | Population |
| Hong HX, Hong ZH, Chen HX, Lin L, Zhu Z. Iliosacral screw fixation of transforaminal sacral fractures using local anesthesia and CT. <i>Journal of the American College of Surgeons</i> . 2010;211(2):e7-12.                                                                                   | Population |
| Lansinger O, Karlsson J, Berg U, Mare K. Unstable fractures of the pelvis treated with a trapezoid compression frame. <i>Acta Orthopaedica Scandinavica</i> . 1984;55(3):325-9.                                                                                                                | Population |
| Latenser BA, Gentilello LM, Tarver AA, Thalgot JS, Batdorf JW. Improved outcome with early fixation of skeletally unstable pelvic fractures. <i>Journal of Trauma-Injury Infection &amp; Critical Care</i> . 1991;31(1):28-31.                                                                 | Population |
| Lindahl J, Hirvensalo E, Bostman O, Santavirta S. Failure of reduction with an external fixator in the management of injuries of the pelvic ring. Long-term evaluation of 110 patients. <i>Journal of Bone &amp; Joint Surgery - British Volume</i> . 1999;81(6):955-62.                       | Population |
| Ma X, Zheng X, Zhao W, et al. Interval versus external fixation for the treatment of pelvic fractures: a comparative study. <i>Clin Invest Med</i> 2017;40(3):E102.                                                                                                                            | Population |
| Matta JM, Saucedo T. Internal fixation of pelvic ring fractures. <i>Clinical Orthopaedics &amp; Related Research</i> . 1989;0(242):83-97.                                                                                                                                                      | Population |
| Moed BR, Whiting DR. Locked transsacral screw fixation of bilateral injuries of the posterior pelvic ring: initial clinical series. <i>Journal of Orthopaedic Trauma</i> . 2010;24(10):616-21.                                                                                                 | Population |
| Noser J, Dietrich M, Tiziani S, et al. Mid-term follow-up after surgical treatment of fragility fractures of the pelvis. <i>Injury</i> 2018;49(11):2032-35.                                                                                                                                    | Population |
| Noser J, Dietrich M, Tiziani S, et al. Mid-term follow-up after surgical treatment of fragility fractures of the pelvis. <i>Injury</i> 2018;49(11):2032-35. doi: 10.1016/j.injury.2018.09.017                                                                                                  | Population |
| Routt ML, Jr., Simonian PT, Grujic L. The retrograde medullary superior pubic ramus screw for the treatment of anterior pelvic ring disruptions: a new technique. <i>Journal of Orthopaedic Trauma</i> . 1995;9(1):35-44.                                                                      | Population |
| Salari P, Cannada LK, Moed BR. Do asymptomatic patients have normal function after percutaneous fixation of the posterior pelvic ring? A case-control pilot study. <i>Journal of Orthopaedic Surgery</i> . 2015;10:68.                                                                         | Population |
| Scherer J, Tiziani S, Sprengel K, et al. Subcutaneous internal anterior fixation of pelvic fractures-which configuration of the InFix is clinically optimal?-a retrospective study. <i>Int Orthop</i> 2018;08:08.                                                                              | Population |

|                                                                                                                                                                                                                                                                                                                              |              |
|------------------------------------------------------------------------------------------------------------------------------------------------------------------------------------------------------------------------------------------------------------------------------------------------------------------------------|--------------|
| Schmitz P, Baumann F, Grechenig S, Gaensslen A, Nerlich M, Muller MB. The cement-augmented transiliacal internal fixator (caTIFI): an innovative surgical technique for stabilization of fragility fractures of the pelvis. <i>Injury</i> . 2015;46:S114-20.                                                                 | Population   |
| Scolaro JA, Firoozabadi R, Routt ML. Treatment of Pediatric and Adolescent Pelvic Ring Injuries With Percutaneous Screw Placement. <i>Journal of Pediatric Orthopedics</i> . 2016;2:2.                                                                                                                                       | Population   |
| Sen RK, Gopinathan NR, Tamuk T, Kumar R, Krishnan V, Sament R. Predictors of early outcome in unstable pelvic fractures. <i>Chinese Journal of Traumatology</i> . 2013;16(2):94-8.                                                                                                                                           | Population   |
| Shui X, Ying X, Mao C, Feng Y, Chen L, Kong J, et al. Percutaneous Screw Fixation of Crescent Fracture-Dislocation of the Sacroiliac Joint. <i>Orthopedics</i> . 2015;38(11):e976-82.                                                                                                                                        | Population   |
| Studer P, Suhm N, Zappe B, Bless N, Jakob M. Pubic rami fractures in the elderly--a neglected injury? <i>Swiss Medical Weekly</i> . 2013;143:w13859.                                                                                                                                                                         | Population   |
| Sullivan MP, Scolaro JA, Milby AH, Mehta S. Isolated pelvic ring injuries: functional outcomes following percutaneous, posterior fixation. <i>European journal of orthopaedic surgery &amp; traumatologie</i> . 2015;25(6):1025-30.                                                                                          | Population   |
| Tosounidis T, Kanakaris N, Nikolaou V, Tan B, Giannoudis PV. Assessment of Lateral Compression type 1 pelvic ring injuries by intraoperative manipulation: which fracture pattern is unstable? <i>International Orthopaedics</i> . 2012;36(12):2553-8.                                                                       | Population   |
| Uchida K, Kokubo Y, Yayama T, Nakajima H, Miyazaki T, Negoro K, et al. Fracture of the pelvic ring: A retrospective review of 224 patients treated at a single institution. <i>European Journal of Orthopaedic Surgery and Traumatology</i> . 2011;21(4):251-7.                                                              | Population   |
| Vaidya R, Martin AJ, Roth M, et al. Midterm Radiographic and Functional Outcomes of the Anterior Subcutaneous Internal Pelvic Fixator (INFIX) for Pelvic Ring Injuries. <i>J Orthop Trauma</i> 2017;31(5):252-59.                                                                                                            | Population   |
| Vaidya R, Martin AJ, Roth M, Tonnos F, Oliphant B, Carlson J. Midterm radiographic and functional outcomes of the anterior internal pelvic fixator (INFIX). <i>Journal of Orthopaedic Trauma</i> . 2017;5:05.                                                                                                                | Population   |
| Vanderschot P, Kupperts M, Sermon A, Lateur L. Trans-iliac-sacral-iliac-bar procedure to treat insufficiency fractures of the sacrum. <i>Indian Journal of Orthopaedics</i> . 2009;43(3):245-52.                                                                                                                             | Population   |
| Wahnert D, Raschke MJ, Fuchs T. Cement augmentation of the navigated iliosacral screw in the treatment of insufficiency fractures of the sacrum: a new method using modified implants. <i>International Orthopaedics</i> . 2013;37(6):1147-50.                                                                               | Population   |
| Wang H, Fu YH, Ke C, et al. Minimally invasive stabilisation of posterior pelvic ring instabilities with pedicle screws connected to a transverse rod. <i>Int Orthop</i> 2018;42(3):681-86. doi: <a href="https://dx.doi.org/10.1007/s00264-017-3714-9">https://dx.doi.org/10.1007/s00264-017-3714-9</a>                     | Population   |
| Webb LX, Caldwell K. Disruption of the posterior pelvic ring caused by vertical shear. <i>Southern Medical Journal</i> . 1988;81(10):1217-21.                                                                                                                                                                                | Population   |
| Wild JJ, Jr., Hanson GW, Tullos HS. Unstable fractures of the pelvis treated by external fixation. <i>Journal of Bone &amp; Joint Surgery - American Volume</i> . 1982;64:1010-1020                                                                                                                                          | Population   |
| Wu X, Liu Z, Fu W, et al. Modified pedicle screw-rod fixation as a minimally invasive treatment for anterior pelvic ring injuries: an initial case series. <i>Journal of Orthopaedic Surgery</i> 2017;12(1):84. doi: <a href="https://dx.doi.org/10.1186/s13018-017-0590-3">https://dx.doi.org/10.1186/s13018-017-0590-3</a> | Population   |
| Yu X, Tang M, Zhou Z, Peng X, Wu T, Sun Y. Minimally invasive treatment for pubic ramus fractures combined with a sacroiliac joint complex injury. <i>International Orthopaedics</i> . 2013;37(8):1547-54.                                                                                                                   | Population   |
| Hasler R. Surgical Treatment of Low Energy Pelvic Fractures in the Elderly. <a href="https://clinicaltrials.gov">ClinicalTrials.Gov</a>                                                                                                                                                                                      | Protocol     |
| Jakob M. Treatment of Pelvic Ring Fractures in the Elderly. <a href="https://clinicaltrials.gov">ClinicalTrials.Gov</a>                                                                                                                                                                                                      | Protocol     |
| Nieves JW. PTH (1-34) and Pelvic Fracture Healing - a Randomized Controlled Trial. <a href="https://clinicaltrials.gov">ClinicalTrials.Gov</a>                                                                                                                                                                               | Protocol     |
| O'Toole R. Pelvis RCT: Impact of Surgery on Pain in Lateral Compression Type Pelvic Fractures. <a href="https://clinicaltrials.gov">ClinicalTrials.Gov</a>                                                                                                                                                                   | Protocol     |
| Zlowodzki M. Comparison of Subcutaneous INFIX and EXFIX for Anterior Pelvic Ring Fractures Requiring Stabilization. <a href="https://clinicaltrials.gov">ClinicalTrials.Gov</a>                                                                                                                                              | Protocol     |
| Beall DP, Datir A, D'Souza SL, D'Souza LS, Gunda D, Morelli J, et al. Percutaneous treatment of insufficiency fractures : principles, technique and review of literature. <i>Skeletal Radiology</i> . 2010;39(2):117-30.                                                                                                     | Study design |
| Beckmann JT, Presson AP, Curtis SH, Haller JM, Stuart AR, Higgins TF, et al. Operative agreement on lateral compression-1 pelvis fractures. a survey of 111 OTA members. <i>Journal of Orthopaedic Trauma</i> . 2014;28(12):681-5.                                                                                           | Study design |
| Clamp JA, King RJ, O'Hara JT, Hahn DM. Osteoporotic pelvic insufficiency fracture with gross instability. <i>Journal of Trauma-Injury Infection &amp; Critical Care</i> . 2008;64(5):1380-2.                                                                                                                                 | Study design |

|                                                                                                                                                                                                                                                                                                                   |              |
|-------------------------------------------------------------------------------------------------------------------------------------------------------------------------------------------------------------------------------------------------------------------------------------------------------------------|--------------|
| De Bastiani G, Aldegheri R, Renzi Brivio L. Dynamic axial fixation. A rational alternative for the external fixation of fractures. <i>International Orthopaedics</i> . 1986;10(2):95-9.                                                                                                                           | Study design |
| Dechert TA, Duane TM, Frykberg BP, Aboutanos MB, Malhotra AK, Ivatury RR. Elderly patients with pelvic fracture: interventions and outcomes. <i>American Surgeon</i> . 2009;75(4):291-5.                                                                                                                          | Study design |
| Draijer F, Egbers HJ, Havemann D. Quality of life after pelvic ring injuries: follow-up results of a prospective study. <i>Archives of Orthopaedic &amp; Trauma Surgery</i> . 1997;116(1):22-6.                                                                                                                   | Study design |
| Firoozabadi R, Oldenburg FP, Krieg JC, Routt MLC. Prevention of iliosacral screw intrusion through the lateral iliac cortex. <i>Techniques in Orthopaedics</i> . 2015;30(1):57-60.                                                                                                                                | Study design |
| Gansslen A, Lindahl J. Evaluation tools and outcomes after osteosynthesis of unstable type B and C pelvic ring injuries. <i>Acta Chirurgiae Orthopaedicae et Traumatologiae Cechoslovaca</i> . 2013;80(5):305-20.                                                                                                 | Study design |
| Gerbershagen HJ, Dagtekin O, Mertens N, Isenberg J, Sabatowski R, Petzke F. Prevalence and severity of chronic pain after pelvic ring fracture. <i>European Journal of Pain</i> . 2009;13:S157.                                                                                                                   | Study design |
| Hausler SM, Strobl FF, Paprottka P, Pieske O, Rubenbauer B, Jakobs TF, et al. Technical outcome, complications and effective patient dose of percutaneous CT-fluoroscopy guided screw placement for the fixation of unstable pelvic fractures. <i>CardioVascular and Interventional Radiology</i> . 2013;36:S391. | Study design |
| Kim WY, Lee SW, Kim KW, et al. Minimally invasive surgical treatment using 'iliac pillar' screw for isolated iliac wing fractures in geriatric patients: a new challenge. <i>European journal of trauma and emergency surgery : official publication of the European Trauma Society</i> 2018                      | Study design |
| Leberte M, Dabezies E. Pelvic fractures. <i>Orthopedics</i> . 1985;8(1):120-3.                                                                                                                                                                                                                                    | Study design |
| Lee SW, Kim WY, Koh SJ, et al. Posterior locked lateral compression injury of the pelvis in geriatric patients: an infrequent and specific variant of the fragility fracture of pelvis. <i>Arch Orthop Trauma Surg</i> 2017;137(9):1207-18.                                                                       | Study design |
| Minarro JC, Quevedo-Reinoso R, Lopez-Pulido MJ, Gonzalez-Fernandez A. Osteoporotic fractures of the pelvis. <i>Osteoporosis International</i> . 2016;1:S139.                                                                                                                                                      | Study design |
| Pennig D. External and internal fixation in pelvic ring disruption. <i>Journal of the Japanese Orthopaedic Association</i> . 1991;65(3):S557.                                                                                                                                                                     | Study design |
| Rommens PM, Ossendorf C, Pairen P, Dietz SO, Wagner D, Hofmann A. Clinical pathways for fragility fractures of the pelvic ring: personal experience and review of the literature. <i>Journal of Orthopaedic Science</i> . 2015;20(1):1-11.                                                                        | Study design |
| Routt ML, Jr., Kregor PJ, Simonian PT, Mayo KA. Early results of percutaneous iliosacral screws placed with the patient in the supine position. <i>Journal of Orthopaedic Trauma</i> . 1995;9(3):207-14.                                                                                                          | Study design |
| Rubash HE, Brown TD, Nelson DD, Mears DC. Comparative mechanical performances of some new devices for fixation of unstable pelvic ring fractures. <i>Medical &amp; Biological Engineering &amp; Computing</i> . 1983;21(6):657-63.                                                                                | Study design |
| Sanders D, Fox J, Starr A, Sathy A, Chao J. Transsacral-Transiliac Screw Stabilization: Effective for Recalcitrant Pain Due to Sacral Insufficiency Fracture. <i>Journal of Orthopaedic Trauma</i> . 2016;30(9):469-73.                                                                                           | Study design |
| Schmitz P, Baumann F, Acklin YP, et al. Clinical application of a minimally invasive cement-augmentable Schanz screw rod system to treat pelvic ring fractures. <i>International orthopaedics</i> 2018 doi: 10.1007/s00264-018-3988-6                                                                             | Study design |
| Suzuki T, Shindo M, Soma K, Minehara H, Nakamura K, Uchino M, et al. Long-term functional outcome after unstable pelvic ring fracture. <i>Journal of Trauma-Injury Infection &amp; Critical Care</i> . 2007;63(4):884-8.                                                                                          | Study design |
| Ting B, Zurakowski D, Herder L, Wagner K, Appleton P, Rodriguez EK. Preinjury ambulatory status is associated with 1-year mortality following lateral compression Type I fractures in the geriatric population older than 80 years. <i>The Journal of Trauma and Acute Care Surgery</i> . 2014;76(5):1306-9.      | Study design |
| Dahners LE, Jacobs RR, Jayaraman G, Mathys Jr R. An external skeletal fixation system for unstable pelvic fractures. <i>Surgical Forum</i> . 1983;0:554-6.                                                                                                                                                        | Unobtainable |
| Wang S, Zhang P, Du D, Yang S. Anterior internal fixation to treat vertical unstable pelvic fracture. <i>Chinese Journal of Traumatology</i> . 2002;5(1):59-61.                                                                                                                                                   | Unobtainable |
